# Supplementary material for: Optimal imaging time points considering accuracy and precision of Patlak linearization for 89Zr-immuno-PET: a simulation study
Source: Springer Nature journal article supplement (doi:10.1186/s13550-022-00927-6), 2022-09-05
Supplement: MOESM1 [file 23455132]

# **Optimal imaging time points considering accuracy and precision of Patlak linearization for $^{89}\text{Zr}$ -immuno-PET: a simulation study**

Jessica E. Wijngaarden<sup>1</sup>, Marc C. Huisman<sup>1</sup>, Johanna E. E. Pouw<sup>2</sup>, C. Willemien Menke-van der Houven van Oordt<sup>2</sup>, Yvonne W.S. Jauw<sup>1,3</sup>, Ronald Boellaard<sup>1</sup>

## **Author's affiliations**

<sup>1</sup> Amsterdam UMC, Vrije Universiteit Amsterdam, Department of Radiology and Nuclear Medicine, Cancer Center Amsterdam, Amsterdam, The Netherlands

<sup>2</sup> Amsterdam UMC, Vrije Universiteit Amsterdam, Department of Medical Oncology, Cancer Center Amsterdam, Amsterdam, The Netherlands

<sup>3</sup> Amsterdam UMC, Vrije Universiteit Amsterdam, Department of Hematology, Cancer Center Amsterdam, Amsterdam, The Netherlands

## **First and corresponding author:**

Name: Jessica E. Wijngaarden

E-mail: [j.e.wijngaarden@amsterdamumc.nl](mailto:j.e.wijngaarden@amsterdamumc.nl) Address: De Boelelaan 1117, 1081 HV Amsterdam, The Netherlands

Telephone number: 020-4442863

Fax number: 020-4444329

## SUPPLEMENTAL 1

The in-house written MATLAB function below was used for the Patlak linearization calculations. Activity concentration in plasma ( $AC_p$ ), activity concentration in tissue ( $AC_t$ ) and time between moment of injection and moment of measurement ( $time$ ) were used as input.

The function provides as output the linear regression fit ( $lin\_fit$ ) obtained from the build-in MATLAB function `polyval`, the calculated Patlak simulated  $K_i$  value ( $K_i$ ), the calculated Patlak  $V_T$  value ( $V_t$ ) and the R-squared of the linear regression fit ( $Rsqr$ ).

```
function [lin_fit,Ki,Vt,Rsqr] = patlak_calc(ACp,ACt,time)
%% Patlak linearization:  $AC_t/AC_p = K_i*(AUC_p/AC_p)+V_t$ 

% AUCp: area under the ACp curve from time of injection to time of
measurement
AUCp = cumtrapz(time,ACp); % numerical integration

% Calculate Patlak x and y values
ACtACp = ACt./ACp;
AUCpACp = AUCp./ACp;

% Calculate Ki and Vt with fitting linear regression (based on least
squares)
stFit = find(time>=24); %indices of time more than 24 hours
stFit = stFit(1);
[coeff,S] = polyfit(AUCpACp(stFit:end),ACtACp(stFit:end),1); %first order
because linear, ignore first datapoint
[lin_fit] = polyval(coeff(:),AUCpACp(stFit:end),S);

Ki = coeff(1)*1000; %from mL/g/h to microL/g/h
Vt = coeff(2);

% R^2 of linear fit
Rsqr = 1-(S.normr/norm(ACtACp-mean(ACtACp)))^2;
end
```
